# Supplementary material for: Forkhead box D subfamily genes in colorectal cancer: potential biomarkers and therapeutic targets
Source: PeerJ journal article supplement (doi:10.7717/peerj.18406), 2024-10-29
Supplement: qPCR_raw_date.zip [file qPCR-Cq.xlsx]

## Sheet: Sheet1
cell qPCR
	GAPDH			FOXD1			FOXD4
CCD841CON	14.35	14.19	14.03		29.95	29.93	29.47	29.11	29.69
SW480	14.05	13.75	13.71		26.09	25.98	28.01	27.47	27.94
SW620	14	13.89	13.6		34.75	33	26.3	25.97	26.35
HT29	14.53	14.3	14.59	29.36	29.19	29.15	27.06		26.84
HCT116	12.92	12.94	12.77	25.85	25.75	25.62		26.93	26.64
	GAPDH			FOXD1			FOXD4
CCD841CON	14.39	14.5	14.78	30.98	30.61	30.89	29.27	29.65	29.81
SW480	14.53	14.57	14.59	28.95	28.94	28.9	28.95	28.53	29.07
SW620	13.41	13.48	13.38	34.27		33.93	25.47	25.35
HT29	14.14	14.09	14.38	30.27	30.28	30.04	26.62	26.39	26.75
HCT116	12.69	12.59	12.56	27	27.04	26.92		25.33	25.57
	GAPDH			FOXD1			FOXD4
CCD841CON	14.34	14.3	14.3	30.87	30.57		28.93	28.88	29.03
SW480	13.89	13.81	13.98	27.14	27.36	27.28	27.26	27.64	27.3
SW620	13.41	13.58	13.32	34.29		32.99	25.33	25.51	25.58
HT29	14.18	14.07	14.19	30.41	30.33	30.16	26.98	26.56	26.57
HCT116	12.66	12.77	12.92	26.95	27.09	27.27	25.76	25.76	25.68
organization qPCR
	FOXD1			GAPDH
N1	34.19		33.96	22.94	22.89	22.8
N2	34.99		35.53	25.43	25.53	25.27
N3	33.39	33.39		23.18	22.92	22.89
N4	33.87		33.09	20.83	20.97	21.07
N5	33.16	33.13	32.74	21.97	21.91	22.13
T1	31.83	31.97	31.75	22.55	22.65	22.21
T2	32.4	31.96	32.25	22.7	22.43	22.55
T3	30.98	30.84	30.9	21.89	21.86	21.91
T4	27.46	27.21	27.27	19.92	19.51	19.77
T5	29.33	29.21	29.32	21.52	21.46	21.46
T6	32.4	31.96	32.25	21.6	21.47	21.92
T7	27.95	28.31	27.8	19.9	19.72	19.9
FOXD4
	FOXD4			GAPDH
N1	34.85	34.95			23.56	23.7
N2	34.9	35.39		25.56	25.48	25.56
N3	30.51	30.2	30.7	20.15	20.05	20.12
N4		33.12	33.44	23.92	23.96	24.05
N5		33.62	33.72	22.64	22.5	22.71
T1	30.1	30.09	30.17	23.79	23.93	23.85
T2	30.02	30.83	30.39	22.26	22.18	21.98
T3	30.95	31.28		21.13		20.97
T4	28.4	28.39		22.85	22.89	22.83
T5	27.8	28.36	28.08	22.63	22.44	22.42
T6	31.72	31.3	31.91	23.91	23.96	24.05
T7	27.12	26.96	27.44	19.92	19.8	19.8
