# Supplementary material for: Forkhead box D subfamily genes in colorectal cancer: potential biomarkers and therapeutic targets
Source: PeerJ. 2024 Oct 29;12:e18406. doi: 10.7717/peerj.18406 (PMC11529599; doi:10.7717/peerj.18406)
Supplement: Supplemental Information 3 [file peerj-12-18406-s003.xlsx]

## Sheet: FOXD1
Details for IHC score of FOXD1
Location	Pathologic classification	Cytoplasm			Note			n	FOXD1 expression		p value
		Staining intensity	positive rate score	Score					High	Low
A01	mucinous adenocarcinoma	1	1	1			Cancer	20	0	20
A02	normal adjacent tissues	0	0	0			Paracancer	20	0	20
A03	mucinous adenocarcinoma	0	0	0
A04	normal adjacent tissues	0	0	0
A05	mucinous adenocarcinoma	1	2	2	containing mucinous component
A06	normal adjacent tissues	1	1	1
A07	mucinous adenocarcinoma	0	0	0	containing mucinous component
A08	normal adjacent tissues	0	0	0
A09	mucinous adenocarcinoma	1	2	2
A10	normal adjacent tissues	0	0	0
B01	mucinous adenocarcinoma	1	1	1
B02	normal adjacent tissues	0	0	0
B03	mucinous adenocarcinoma	1	2	2	containing mucinous component
B04	normal adjacent tissues	0	0	0
B05	mucinous adenocarcinoma	0	0	0	containing mucinous component
B06	normal adjacent tissues	0	0	0
B07	mucinous adenocarcinoma	0	0	0	containing mucinous component
B08	normal adjacent tissues	0	0	0
B09	mucinous adenocarcinoma	1	1	1
B10	normal adjacent tissues	0	0	0
C01	mucinous adenocarcinoma	1	1	1
C02	normal adjacent tissues	1	1	1
C03	mucinous adenocarcinoma	0	0	0
C04	normal adjacent tissues	0	0	0
C05	mucinous adenocarcinoma	0	0	0
C06	normal adjacent tissues	0	0	0
C07	mucinous adenocarcinoma	1	1	1	containing mucinous component
C08	normal adjacent tissues	0	0	0
C09	mucinous adenocarcinoma	0	0	0
C10	normal adjacent tissues	0	0	0
D01	mucinous adenocarcinoma	1	2	2
D02	normal adjacent tissues	0	0	0
D03	mucinous adenocarcinoma	0	0	0
D04	normal adjacent tissues	0	0	0
D05	mucinous adenocarcinoma	0	0	0
D06	normal adjacent tissues	0	0	0
D07	mucinous adenocarcinoma	1	1	1
D08	normal adjacent tissues	0	0	0
D09	mucinous adenocarcinoma	1	1	1
D10	normal adjacent tissues	0	0	0

## Sheet: FOXD2
Details for IHC score of FOXD2
Location	Pathologic classification	Cytoplasm			Note			n	FOXD2 expression		p value
		Staining intensity	positive rate score	Score					High	Low
A01	mucinous adenocarcinoma	2	3	6			Cancer	20	15	5	p<0.0001
A02	normal adjacent tissues	2	2	4			Paracancer	20	1	19
A03	mucinous adenocarcinoma	3	3	9
A04	normal adjacent tissues	2	3	6
A05	mucinous adenocarcinoma	2	4	8	containing mucinous component
A06	normal adjacent tissues	1	3	3
A07	mucinous adenocarcinoma	3	3	6	containing mucinous component
A08	normal adjacent tissues	1	2	2
A09	mucinous adenocarcinoma	2	4	8
A10	normal adjacent tissues	2	2	4
B01	mucinous adenocarcinoma	3	3	9
B02	normal adjacent tissues	1	3	3
B03	mucinous adenocarcinoma	2	4	8	containing mucinous component
B04	normal adjacent tissues	1	3	3
B05	mucinous adenocarcinoma	3	2	6	containing mucinous component
B06	normal adjacent tissues	1	4	4
B07	mucinous adenocarcinoma	3	2	6	containing mucinous component
B08	normal adjacent tissues	1	2	2
B09	mucinous adenocarcinoma	2	2	4
B10	normal adjacent tissues	1	3	3
C01	mucinous adenocarcinoma	2	4	8
C02	normal adjacent tissues	1	3	3
C03	mucinous adenocarcinoma	3	2	6
C04	normal adjacent tissues	1	2	2
C05	mucinous adenocarcinoma	3	2	6
C06	normal adjacent tissues	1	2	2
C07	mucinous adenocarcinoma	2	2	4	containing mucinous component
C08	normal adjacent tissues	1	3	3			#REF!	#REF!
C09	mucinous adenocarcinoma	3	1	3
C10	normal adjacent tissues	2	2	4
D01	mucinous adenocarcinoma	3	2	6
D02	normal adjacent tissues	1	3	3
D03	mucinous adenocarcinoma	2	2	4
D04	normal adjacent tissues	1	2	2
D05	mucinous adenocarcinoma	2	2	4
D06	normal adjacent tissues	1	2	2
D07	mucinous adenocarcinoma	2	3	6
D08	normal adjacent tissues	2	2	4
D09	mucinous adenocarcinoma	2	4	8
D10	normal adjacent tissues	1	3	3

## Sheet: FOXD3
Details for IHC score of FOXD3
Location	Pathologic classification	Cytoplasm			Note			n	FOXD3 expression		p value
		Staining intensity	positive rate score	Score					High	Low
A01	mucinous adenocarcinoma	3	4	12			Cancer	20	20	0	p<0.0001
A02	normal adjacent tissues	2	2	4			Paracancer	20	1	19
A03	mucinous adenocarcinoma	3	3	9
A04	normal adjacent tissues	1	1	1
A05	mucinous adenocarcinoma	2	4	8	containing mucinous component
A06	normal adjacent tissues	1	3	3
A07	mucinous adenocarcinoma	3	2	6	containing mucinous component
A08	normal adjacent tissues	1	2	2
A09	mucinous adenocarcinoma	3	4	12
A10	normal adjacent tissues	1	4	4
B01	mucinous adenocarcinoma	3	4	12
B02	normal adjacent tissues	1	3	3
B03	mucinous adenocarcinoma	2	4	8	containing mucinous component
B04	normal adjacent tissues	1	2	2
B05	mucinous adenocarcinoma	3	4	12	containing mucinous component
B06	normal adjacent tissues	2	3	6
B07	mucinous adenocarcinoma	3	3	9	containing mucinous component
B08	normal adjacent tissues	1	3	3
B09	mucinous adenocarcinoma	3	4	12
B10	normal adjacent tissues	1	3	3
C01	mucinous adenocarcinoma	3	4	12
C02	normal adjacent tissues	2	2	4
C03	mucinous adenocarcinoma	3	2	6
C04	normal adjacent tissues	1	2	2
C05	mucinous adenocarcinoma	3	4	12
C06	normal adjacent tissues	1	3	3
C07	mucinous adenocarcinoma	2	4	8	containing mucinous component
C08	normal adjacent tissues	1	1	1
C09	mucinous adenocarcinoma	3	4	12
C10	normal adjacent tissues	1	2	2
D01	mucinous adenocarcinoma	3	3	9
D02	normal adjacent tissues	1	2	2
D03	mucinous adenocarcinoma	3	4	12
D04	normal adjacent tissues	1	3	3
D05	mucinous adenocarcinoma	2	4	8
D06	normal adjacent tissues	1	2	2
D07	mucinous adenocarcinoma	3	3	9
D08	normal adjacent tissues	1	1	1
D09	mucinous adenocarcinoma	3	4	12
D10	normal adjacent tissues	2	2	4

## Sheet: FOXD4
Details for IHC score of FOXD4
Location	Pathologic classification	Cytoplasm			Note			n	FOXD4 expression		p value
		Staining intensity	positive rate score	Score					High	Low
A01	mucinous adenocarcinoma	2	4	8			Cancer	20	19	1	p<0.0001
A02	normal adjacent tissues	2	2	4			Paracancer	20	0	20
A03	mucinous adenocarcinoma	3	3	9
A04	normal adjacent tissues	2	2	4
A05	mucinous adenocarcinoma	2	4	8	containing mucinous component
A06	normal adjacent tissues	2	2	4
A07	mucinous adenocarcinoma	2	3	6	containing mucinous component
A08	normal adjacent tissues	1	3	3
A09	mucinous adenocarcinoma	3	3	9
A10	normal adjacent tissues	2	2	4
B01	mucinous adenocarcinoma	3	3	9
B02	normal adjacent tissues	1	2	2
B03	mucinous adenocarcinoma	2	4	8	containing mucinous component
B04	normal adjacent tissues	1	3	3
B05	mucinous adenocarcinoma	3	4	12	containing mucinous component
B06	normal adjacent tissues	3	1	3
B07	mucinous adenocarcinoma	3	2	6	containing mucinous component
B08	normal adjacent tissues	1	4	4
B09	mucinous adenocarcinoma	3	4	12
B10	normal adjacent tissues	2	2	4
C01	mucinous adenocarcinoma	2	4	8
C02	normal adjacent tissues	2	1	2
C03	mucinous adenocarcinoma	2	3	6
C04	normal adjacent tissues	1	2	2
C05	mucinous adenocarcinoma	2	3	6
C06	normal adjacent tissues	2	1	2
C07	mucinous adenocarcinoma	2	4	8	containing mucinous component
C08	normal adjacent tissues	1	1	1
C09	mucinous adenocarcinoma	3	4	12
C10	normal adjacent tissues	1	2	2
D01	mucinous adenocarcinoma	3	3	9
D02	normal adjacent tissues	1	2	2
D03	mucinous adenocarcinoma	2	2	4
D04	normal adjacent tissues	1	1	1
D05	mucinous adenocarcinoma	2	4	8
D06	normal adjacent tissues	1	1	1
D07	mucinous adenocarcinoma	3	3	9
D08	normal adjacent tissues	1	2	2
D09	mucinous adenocarcinoma	3	4	12
D10	normal adjacent tissues	1	1	1
