# Supplementary material for: Forkhead box D subfamily genes in colorectal cancer: potential biomarkers and therapeutic targets
Source: PeerJ. 2024 Oct 29;12:e18406. doi: 10.7717/peerj.18406 (PMC11529599; doi:10.7717/peerj.18406)
Supplement: Supplemental Information 10 [file peerj-12-18406-s010.xls]

## Sheet: Sheet1
ITEM TO CHECK	IMPORTANCE	CHECKLIST
EXPERIMENTAL DESIGN
Definition of experimental and control groups	E	Page 4, lines 160-161
Number within each group	E	Page 4, lines 160-161
Assay carried out by core lab or investigator's lab?	D
Acknowledgement of authors' contributions	D
SAMPLE
Description	E	Page 4, lines 159-161
Volume/mass of sample processed	D
Microdissection or macrodissection	E	macrodissection
Processing procedure	E	Page 4, lines 159-161
If frozen - how and how quickly?	E	Page 4, lines 159
If fixed - with what, how quickly?	E	Page 4, lines 159
Sample storage conditions and duration (especially for FFPE samples)	E	Page 4, lines 159-161
NUCLEIC ACID EXTRACTION
Procedure and/or instrumentation	E	Page 4, lines 159-162
Name of kit and details of any modifications	E	Page 4, lines 159
Source of additional reagents used	D
Details of DNase or RNAse treatment	E	Page 4, lines 161-163
Contamination assessment (DNA or RNA)	E	Page 4, lines 161-163
Nucleic acid quantification	E	Page 4, lines 161-163
Instrument and method	E	Page 4, lines 159-163
Purity (A260/A280)	D
Yield	D
RNA integrity method/instrument	E	Page 4, lines 161-162
RIN/RQI or Cq of 3' and 5' transcripts	E	Page 4, lines 159
Electrophoresis traces	D
Inhibition testing (Cq dilutions, spike or other)	E	Page 4, lines 159
REVERSE TRANSCRIPTION
Complete reaction conditions	E	Page 4, lines 165-166
Amount of RNA and reaction volume	E	Page 4, lines 166
Priming oligonucleotide (if using GSP) and concentration	E	Page 4, lines 165-166
Reverse transcriptase and concentration	E	Page 4, lines 165-166
Temperature and time	E	Page 4, lines 165-166
Manufacturer of reagents and catalogue numbers	D
Cqs with and without RT	D*
Storage conditions of cDNA	D
qPCR TARGET INFORMATION
If multiplex, efficiency and LOD of each assay.	E	Table S1
Sequence accession number	E	Table S1
Location of amplicon	D
Amplicon length	E	Table S1
In silico specificity screen (BLAST, etc)	E	Table S1
Pseudogenes, retropseudogenes or other homologs?	D
Sequence alignment	D
Secondary structure analysis of amplicon	D
Location of each primer by exon or intron (if applicable)	E	Table S1
What splice variants are targeted?	E	Table S1
qPCR OLIGONUCLEOTIDES
Primer sequences	E	Table S1
RTPrimerDB Identification Number	D
Probe sequences	D**
Location and identity of any modifications	E	Table S1
Manufacturer of oligonucleotides	D
Purification method	D
qPCR PROTOCOL
Complete reaction conditions	E	Page 4, lines 164-165
Reaction volume and amount of cDNA/DNA	E	Page 4, lines 166
Primer, (probe), Mg++ and dNTP concentrations	E	Page 4, lines 165
Polymerase identity and concentration	E	Page 4, lines 165
Buffer/kit identity and manufacturer	E	Page 4, lines 165
Exact chemical constitution of the buffer	D
Additives (SYBR Green I, DMSO, etc.)	E	Page 4, lines 165
Manufacturer of plates/tubes and catalog number	D
Complete thermocycling parameters	E	Page 4, lines 165
Reaction setup (manual/robotic)	D
Manufacturer of qPCR instrument	E	Page 4, lines 167
qPCR VALIDATION
Evidence of optimisation (from gradients)	D
Specificity (gel, sequence, melt, or digest)	E	qPCR raw date
For SYBR Green I, Cq of the NTC	E	qPCR raw date
Standard curves with slope and y-intercept	E	qPCR raw date
PCR efficiency calculated from slope	E	qPCR raw date
Confidence interval for PCR efficiency or standard error	D
r2 of standard curve	E	qPCR raw date
Linear dynamic range	E	qPCR raw date
Cq variation at lower limit	E	qPCR raw date
Confidence intervals throughout range	D
Evidence for limit of detection	E	qPCR raw date
If multiplex, efficiency and LOD of each assay.	E	qPCR raw date
DATA ANALYSIS
qPCR analysis program (source, version)	E	Page 4, lines 167
Cq method determination	E	Page 4, lines 169
Outlier identification and disposition	E	qPCR raw date
Results of NTCs	E	qPCR raw date
Justification of number and choice of reference genes	E	qPCR raw date
Description of normalisation method	E	Page 4, lines 165
Number and concordance of biological replicates	D
Number and stage (RT or qPCR) of technical replicates	E	qPCR raw date
Repeatability (intra-assay variation)	E	qPCR raw date
Reproducibility (inter-assay variation, %CV)	D
Power analysis	D
Statistical methods for result significance	E	Page 4, lines 174-175
Software (source, version)	E	Page 4, lines 174-175
Cq or raw data submission using RDML	D
Table 1. MIQE checklist for authors, reviewers and editors. All essential information (E) must be submitted with the manuscript. Desirable
information (D) should be submitted if available. If using primers obtained from RTPrimerDB, information on qPCR target, oligonucleotides,
protocols and validation is available from that source.
*: Assessing the absence of DNA using a no RT assay is essential when first extracting RNA. Once the sample has been validated as
RDNA-free, inclusion of a no-RT control is desirable, but no longer essential.
**: Disclosure of the probe sequence is highly desirable and strongly encouraged. However, since not all commercial pre-designed assay
vendors provide this information, it cannot be an essential requirement. Use of such assays is advised against.
